# Supplementary material
Source: publisher site journal article supplement (https://www.dovepress.com/article/492887)
Supplement: Supplementary file 1 [file get_supplementary_file.php]

**Electronic Supplementary Doc [ESD] eTable 1. PRISMA Checklist Results**

| **Section and Topic** | **Item #** | **Checklist item** | **Location where item is reported** |
| --- | --- | --- | --- |
| **TITLE** | | |  |
| Title | 1 | Identify the report as a systematic review. | Page 1 |
| **ABSTRACT** | | |  |
| Abstract | 2 | See the PRISMA 2020 for Abstracts checklist. | Page 2 |
| **INTRODUCTION** | | |  |
| Rationale | 3 | Describe the rationale for the review in the context of existing knowledge. | Page 5 |
| Objectives | 4 | Provide an explicit statement of the objective(s) or question(s) the review addresses. | Page 6 |
| **METHODS** | | |  |
| Eligibility criteria | 5 | Specify the inclusion and exclusion criteria for the review and how studies were grouped for the syntheses. | Page 8  Lines 169-189 |
| Information sources | 6 | Specify all databases, registers, websites, organisations, reference lists and other sources searched or consulted to identify studies. Specify the date when each source was last searched or consulted. | Page 7  Lines 147-148 |
| Search strategy | 7 | Present the full search strategies for all databases, registers and websites, including any filters and limits used. | Page 7  Lines 147-161 |
| Selection process | 8 | Specify the methods used to decide whether a study met the inclusion criteria of the review, including how many reviewers screened each record and each report retrieved, whether they worked independently, and if applicable, details of automation tools used in the process. | Page 8  Lines 164-177 |
| Data collection process | 9 | Specify the methods used to collect data from reports, including how many reviewers collected data from each report, whether they worked independently, any processes for obtaining or confirming data from study investigators, and if applicable, details of automation tools used in the process. | Pages 8&9  Lines 180-189 |
| Data items | 10a | List and define all outcomes for which data were sought. Specify whether all results that were compatible with each outcome domain in each study were sought (e.g. for all measures, time points, analyses), and if not, the methods used to decide which results to collect. | Pages 8&9 Lines 180-189 |
| 10b | List and define all other variables for which data were sought (e.g. participant and intervention characteristics, funding sources). Describe any assumptions made about any missing or unclear information. | Pages 8&9 Lines 180-189 |
| Study risk of bias assessment | 11 | Specify the methods used to assess risk of bias in the included studies, including details of the tool(s) used, how many reviewers assessed each study and whether they worked independently, and if applicable, details of automation tools used in the process. | Page 9 Lines 192-202 |
| Effect measures | 12 | Specify for each outcome the effect measure(s) (e.g. risk ratio, mean difference) used in the synthesis or presentation of results. | Page 7-8 |
| Synthesis methods | 13a | Describe the processes used to decide which studies were eligible for each synthesis (e.g. tabulating the study intervention characteristics and comparing against the planned groups for each synthesis (item #5)). | Page 8 Lines 169-189 |
| 13b | Describe any methods required to prepare the data for presentation or synthesis, such as handling of missing summary statistics, or data conversions. | NA |
| 13c | Describe any methods used to tabulate or visually display results of individual studies and syntheses. | Page 8 Lines 180-181 |
| 13d | Describe any methods used to synthesize results and provide a rationale for the choice(s). If meta-analysis was performed, describe the model(s), method(s) to identify the presence and extent of statistical heterogeneity, and software package(s) used. | NA |
| 13e | Describe any methods used to explore possible causes of heterogeneity among study results (e.g. subgroup analysis, meta-regression). | Page 14 Lines 313-315 |
| 13f | Describe any sensitivity analyses conducted to assess robustness of the synthesized results. |  |
| Reporting bias assessment | 14 | Describe any methods used to assess risk of bias due to missing results in a synthesis (arising from reporting biases). | Page 7 |
| Certainty assessment | 15 | Describe any methods used to assess certainty (or confidence) in the body of evidence for an outcome. | Page 7 |
| **RESULTS** | | |  |
| Study selection | 16a | Describe the results of the search and selection process, from the number of records identified in the search to the number of studies included in the review, ideally using a flow diagram. | Page 10 Lines 207-213 |
| 16b | Cite studies that might appear to meet the inclusion criteria, but which were excluded, and explain why they were excluded. | Page 10 Lines 209-213 |
| Study characteristics | 17 | Cite each included study and present its characteristics. | Page 10 Lines 214-222 |
| Risk of bias in studies | 18 | Present assessments of risk of bias for each included study. | Page 12 Lines 267-269 |
| Results of individual studies | 19 | For all outcomes, present, for each study: (a) summary statistics for each group (where appropriate) and (b) an effect estimate and its precision (e.g. confidence/credible interval), ideally using structured tables or plots. | Pages 28-39 (tables) |
| Results of syntheses | 20a | For each synthesis, briefly summarise the characteristics and risk of bias among contributing studies. | Page 12 Lines 267-269 |
| 20b | Present results of all statistical syntheses conducted. If meta-analysis was done, present for each the summary estimate and its precision (e.g. confidence/credible interval) and measures of statistical heterogeneity. If comparing groups, describe the direction of the effect. | Pages 10-12 Lines 225-263 |
| 20c | Present results of all investigations of possible causes of heterogeneity among study results. | Page 14 Lines 313-315 |
| 20d | Present results of all sensitivity analyses conducted to assess the robustness of the synthesized results. | NA |
| Reporting biases | 21 | Present assessments of risk of bias due to missing results (arising from reporting biases) for each synthesis assessed. | NA |
| Certainty of evidence | 22 | Present assessments of certainty (or confidence) in the body of evidence for each outcome assessed. | NA |
| **DISCUSSION** | | |  |
| Discussion | 23a | Provide a general interpretation of the results in the context of other evidence. | Pages 13&14 Lines 274-298 |
| 23b | Discuss any limitations of the evidence included in the review. | Pages 14&15 Lines 313-321 |
| 23c | Discuss any limitations of the review processes used. | Pages 14&15 Lines 313-321 |
| 23d | Discuss implications of the results for practice, policy, and future research. | Page 15 Lines 324-335 |
| **OTHER INFORMATION** | | |  |
| Registration and protocol | 24a | Provide registration information for the review, including register name and registration number, or state that the review was not registered. | NA |
| 24b | Indicate where the review protocol can be accessed, or state that a protocol was not prepared. | Page 6 |
| 24c | Describe and explain any amendments to information provided at registration or in the protocol. | NA |
| Support | 25 | Describe sources of financial or non-financial support for the review, and the role of the funders or sponsors in the review. | Page 1 |
| Competing interests | 26 | Declare any competing interests of review authors. | Page 1 |
| Availability of data, code and other materials | 27 | Report which of the following are publicly available and where they can be found: template data collection forms; data extracted from included studies; data used for all analyses; analytic code; any other materials used in the review. | Page 22 |

*From:*  Page MJ, McKenzie JE, Bossuyt PM, Boutron I, Hoffmann TC, Mulrow CD, et al. The PRISMA 2020 statement: an updated guideline for reporting systematic reviews. BMJ 2021;372:n71. doi: 10.1136/bmj.n71

**Electronic Supplementary Doc [ESD] eTable 2. Inclusion/Exclusion Criteria for Screening Articles**

| *Population* | Rheumatoid arthritis patients |
| --- | --- |
| *Intervention* | Janus Kinase inhibitors (Tofacitinib, Upadacitinib, Baricitinib) |
| *Comparator* | none |
| *Outcomes* | Adherence, Persistence, Effectiveness, Clinical outcomes, Patient reported outcomes |
| *Study design* | Requiring real-world observational datasets |
| *Timing* | From 2012 till June 2, 2023 |
| *Setting* | US-setting |
| *Inclusion Criteria* | (1) Must focus on rheumatoid arthritis patients; (2) Must have JAKi as intervention; (3) Must have one of outcomes of interest; (4) Must use real-world evidence; (5) Must be US-based; (6) Must be published after 2012; (7) Must be in English |
| *Exclusion Criteria* | (1) Randomized clinical trials and long-term evaluations; (2) Systematic reviews and meta-analysis |

**Electronic Supplementary Doc [ESD] eTable 3**

**Databases Searched**

| Date | Name | Records |
| --- | --- | --- |
| 6/02/2023 | PUBMED | 174 |
| 6/02/2023 | EMBASE | 1032 |
| 6/02/2023 | CINAHL | 31 |

| **Databases= PUBMED, Search date: 6/02/2023** | | |
| --- | --- | --- |
| Query | Terms | No. of Studies |
| 1 | Rheumatoid arthritis[Title/Abstract] | 121,055 |
| 2 | Rheumatoid arthritis[MeSH Terms] | 125,240 |
| 3 | #1 or #2 | 165,516 |
| 4 | ((((((((((Janus kinase inhibitor*[Title/Abstract]) OR (JAK inhibitor*[Title/Abstract])) OR (JAKi[Title/Abstract])) OR (jakinibs[Title/Abstract])) OR (targeted synthetic disease-modifying antirheumatic drug*[Title/Abstract])) OR (targeted synthetic DMARD*[Title/Abstract])) OR (tsDMARD*[Title/Abstract])) OR (tofacitinib[Title/Abstract])) OR (baricitinib[Title/Abstract])) OR (upadacitinib[Title/Abstract])) OR (filgotinib​[Title/Abstract]) | 6,934 |
| 5 | #3 AND #4 | 1,890 |
| 6 | (‘cohort analysis’[Title/Abstract] OR ‘cohort analysis’[Title/Abstract] OR 'longitudinal study’[Title/Abstract] OR 'prospective study'[Title/Abstract] OR 'retrospective study'[Title/Abstract] OR 'cross-sectional study'[Title/Abstract] OR 'case control study'[Title/Abstract] OR cohort*[Title/Abstract] OR database*[Title/Abstract] OR registry[Title/Abstract] OR registries[Title/Abstract] OR prospective[Title/Abstract] OR retrospective[Title/Abstract] OR chart review[Title/Abstract] OR claims[Title/Abstract] OR survey[Title/Abstract] OR real world[Title/Abstract] OR realworld[Title/Abstract] OR observational study[Title/Abstract]) NOT (randomized controlled trial*[Title/Abstract]) | 3,481,079 |
| 7 | #5 AND #6 | 480 |
| 8 | United States OR United States of America OR USA OR U.S.A OR US OR U.S | 8,593,246 |
| 9 | #7 AND #8 | 174 |

**Electronic Supplementary Doc [ESD] eTable 4. The Newcastle-Ottawa Scale**

| Criteria | Definition |
| --- | --- |
| **Selection** | |
| Representativeness of the exposed cohort | a) truly representative of the average _______________ (describe) in the community *  b) somewhat representative of the average ______________ in the community* c) selected group of users eg nurses, volunteers d) no description of the derivation of the cohort |
| Selection of the non exposed cohort | a) drawn from the same community as the exposed cohort * b) drawn from a different source c) no description of the derivation of the non exposed cohort |
| Ascertainment of exposure | a) secure recorded* b)structured interview* c) written self-report d)no description |
| Demonstration that outcome of interest was not present at start of study | a) yes* b) no |
| **Comparability** | |
| Comparability of cohorts on the basis of the design or analysis | a) study controls for _____________ (select the most important factor)* b) study controls for any additional factor.* (This criteria could be modified to indicate specific control for a second important factor.) |
| **Outcome** | |
| Assessment of outcome | a) independent blind assessment *  b) record linkage * c) self report  d) no description |
| Was follow-up long enough for outcomes to occur | a) yes (select an adequate follow up period for outcome of interest) * b) no |
| Adequacy of follow up of cohorts | a) complete follow up - all subjects accounted for * b) subjects lost to follow up unlikely to introduce bias - small number lost - > ____ % (select an adequate %) follow up, or description provided of those lost) * c) follow up rate < ____% (select an adequate %) and no description of those lost d) no statement |

**Electronic Supplementary Doc [ESD] eTable 5. Quality assessment using the Newcastle-Ottawa Scale**

| Criteria | Cohen 2021 | Fendrick 2023 | Gharaibeh 2020 | Harnett 2016 | Harrold 2023 | Machado 2018 | Padula 2022 | Reed 2019 |
| --- | --- | --- | --- | --- | --- | --- | --- | --- |
| **Selection** | | | | | | | | |
| Representativeness of the exposed cohort | * | * | * | * | * | * | * | * |
| Selection of the non exposed cohort | * | * | * | * | * | * | * | * |
| Ascertainment of exposure | * | * | * | * | * | * | * | * |
| Demonstration that outcome of interest was not present at start of study | _ | _ | _ | _ | _ | _ | _ | _ |
| **Comparability** | | | | | | | | |
| Comparability of cohorts on the basis of the design or analysis | ** | ** | _ | _ | ** | ** | ** | ** |
| **Outcome** | | | | | | | | |
| Assessment of outcome | * | * | * | * | * | * | * | * |
| Was follow-up long enough for outcomes to occur | * | * | * | * | * | * | * | * |
| Adequacy of follow up of cohorts | * | * | * | * | * | * | * | * |
